# Supplementary material for: Comparison of growth and physiological characteristics between roughstalk bluegrass and tall fescue in response to simulated waterlogging
Source: PLoS One. 2017 Jul 27;12(7):e0182035. doi: 10.1371/journal.pone.0182035 (PMC5531569; doi:10.1371/journal.pone.0182035)
Supplement: S4 Fig — LDH activity changes in roots of control tall fescue (TF-cnt), control roughstalk bluegrass (RB-cnt), waterlogged tall fescue (TF-wl), and waterlogged roughstalk bluegrass (RB-wl) during the 4-week greenhouse study. Data represent means of 32 individuals. Means in the same week with the same letter are not different based on Duncan’s multiple range test at 0.05 probability. (XLSX) [file pone.0182035.s004.xlsx]

## Sheet: LDH readings (Roots-fig8)
Roots						U/mg
study	pop	treat	weeks	deltC(U/ml)	ProteinC(ug/ml)	ADH
1	TF	nor	1	139.963	1029.31	0.135978
1	TF	nor	1	160.336	1029.31	0.155771
1	TF	nor	1	118.621	1029.31	0.115244
1	TF	nor	1	139.875	1029.31	0.135892
2	TF	nor	1	132.663	881.265	0.150537
2	TF	nor	1	160.112	881.265	0.181684
2	TF	nor	1	102.838	881.265	0.116694
2	TF	nor	1	130.997	881.265	0.148647
1	TF	wl	1	133.343	1029.31	0.129546
1	TF	wl	1	170.557	1029.31	0.165701
1	TF	wl	1	95.17	1029.31	0.0924603
1	TF	wl	1	126.883	1029.31	0.12327
2	TF	wl	1	187.835	881.265	0.213142
2	TF	wl	1	174.443	881.265	0.197946
2	TF	wl	1	163.337	881.265	0.185344
2	TF	wl	1	176.942	881.265	0.200782
1	TF	nor	2	15.1451	108.625	0.139426
1	TF	nor	2	16.3315	108.625	0.150348
1	TF	nor	2	10.1214	108.625	0.0931776
1	TF	nor	2	11.0114	108.625	0.101371
2	TF	nor	2	22.6365	113.004	0.200316
2	TF	nor	2	20.7963	113.004	0.184032
2	TF	nor	2	12.6637	113.004	0.112064
2	TF	nor	2	18.7453	113.004	0.165882
1	TF	wl	2	26.3835	108.625	0.242887
1	TF	wl	2	20.113	108.625	0.18516
1	TF	wl	2	17.1872	108.625	0.158225
1	TF	wl	2	17.8096	108.625	0.163955
2	TF	wl	2	17.5384	113.004	0.155202
2	TF	wl	2	13.1213	113.004	0.116114
2	TF	wl	2	21.0323	113.004	0.18612
2	TF	wl	2	16.9231	113.004	0.149757
1	TF	nor	3	11.2453	99.1855	0.113377
1	TF	nor	3	10.1664	99.1855	0.102499
1	TF	nor	3	20.1135	99.1855	0.202787
1	TF	nor	3	23.2201	99.1855	0.234108
2	TF	nor	3	20.3334	96.1101	0.211564
2	TF	nor	3	10.3237	96.1101	0.107415
2	TF	nor	3	14.121	96.1101	0.146925
2	TF	nor	3	16.3352	96.1101	0.169963
1	TF	wl	3	22.6639	99.1855	0.2285
1	TF	wl	3	18.6762	99.1855	0.188296
1	TF	wl	3	8.9453	99.1855	0.0901876
1	TF	wl	3	17.3334	99.1855	0.174757
2	TF	wl	3	22.3141	96.1101	0.232172
2	TF	wl	3	21.6334	96.1101	0.22509
2	TF	wl	3	16.5731	96.1101	0.172439
2	TF	wl	3	13.5332	96.1101	0.140809
1	TF	nor	4	17.7714	159.512	0.111411
1	TF	nor	4	16.7231	159.512	0.104839
1	TF	nor	4	12.9633	159.512	0.0812685
1	TF	nor	4	15.8997	159.512	0.0996772
2	TF	nor	4	13.3531	130.115	0.102625
2	TF	nor	4	12.2214	130.115	0.0939273
2	TF	nor	4	16.5453	130.115	0.127159
2	TF	nor	4	19.2207	130.115	0.14772
1	TF	wl	4	19.8483	159.512	0.124431
1	TF	wl	4	24.1334	159.512	0.151295
1	TF	wl	4	17.0071	159.512	0.10662
1	TF	wl	4	8.8009	159.512	0.0551739
2	TF	wl	4	20.8835	130.115	0.1605
2	TF	wl	4	19.8363	130.115	0.152452
2	TF	wl	4	17.3334	130.115	0.133216
2	TF	wl	4	11.5473	130.115	0.0887466
1	RB	nor	1	135.991	803.283	0.169294
1	RB	nor	1	119.947	803.283	0.149321
1	RB	nor	1	116.632	803.283	0.145194
1	RB	nor	1	110.767	803.283	0.137893
2	RB	nor	1	124.339	741.966	0.16758
2	RB	nor	1	125.966	741.966	0.169773
2	RB	nor	1	127.534	741.966	0.171887
2	RB	nor	1	129.081	741.966	0.173972
1	RB	wl	1	170.636	803.283	0.212423
1	RB	wl	1	149.667	803.283	0.186319
1	RB	wl	1	139.331	803.283	0.173452
1	RB	wl	1	102.997	803.283	0.12822
2	RB	wl	1	113.633	741.966	0.153151
2	RB	wl	1	160.639	741.966	0.216505
2	RB	wl	1	100.753	741.966	0.135792
2	RB	wl	1	82.359	741.966	0.111001
1	RB	nor	2	17.7481	133.673	0.132772
1	RB	nor	2	18.9362	133.673	0.141661
1	RB	nor	2	14.8451	133.673	0.111055
1	RB	nor	2	15.5058	133.673	0.115998
2	RB	nor	2	26.6631	123.694	0.215557
2	RB	nor	2	27.7892	123.694	0.224661
2	RB	nor	2	20.3334	123.694	0.164385
2	RB	nor	2	19.3334	123.694	0.1563
1	RB	wl	2	22.1745	133.673	0.165886
1	RB	wl	2	19.0653	133.673	0.142626
1	RB	wl	2	17.7891	133.673	0.133079
1	RB	wl	2	18.6603	133.673	0.139597
2	RB	wl	2	32.7101	123.694	0.264444
2	RB	wl	2	29.6637	123.694	0.239815
2	RB	wl	2	28.9315	123.694	0.233896
2	RB	wl	2	24.0561	123.694	0.194481
1	RB	nor	3	12.9436	94.4551	0.137034
1	RB	nor	3	11.3399	94.4551	0.120056
1	RB	nor	3	7.2331	94.4551	0.0765771
1	RB	nor	3	6.9626	94.4551	0.0737133
2	RB	nor	3	13.5058	109.74	0.12307
2	RB	nor	3	13.7451	109.74	0.125251
2	RB	nor	3	8.9364	109.74	0.0814322
2	RB	nor	3	9.994	109.74	0.0910695
1	RB	wl	3	11.3238	94.4551	0.119886
1	RB	wl	3	6.6637	94.4551	0.0705489
1	RB	wl	3	9.7617	94.4551	0.103348
1	RB	wl	3	15.9874	94.4551	0.169259
2	RB	wl	3	14.3114	109.74	0.130411
2	RB	wl	3	12.6337	109.74	0.115123
2	RB	wl	3	10.743	109.74	0.0978946
2	RB	wl	3	9.8653	109.74	0.0898967
1	RB	nor	4	30.8863	153.429	0.201307
1	RB	nor	4	27.7963	153.429	0.181167
1	RB	nor	4	26.6334	153.429	0.173588
1	RB	nor	4	17.0827	153.429	0.111339
2	RB	nor	4	25.4433	105.393	0.241414
2	RB	nor	4	13.465	105.393	0.12776
2	RB	nor	4	16.3419	105.393	0.155057
2	RB	nor	4	17.0603	105.393	0.161874
1	RB	wl	4	18.8389	153.429	0.122786
1	RB	wl	4	16.6531	153.429	0.10854
1	RB	wl	4	15.0533	153.429	0.0981125
1	RB	wl	4	15.0532	153.429	0.0981119
2	RB	wl	4	27.3541	105.393	0.259545
2	RB	wl	4	28.4503	105.393	0.269946
2	RB	wl	4	28.2971	105.393	0.268492
2	RB	wl	4	29.0383	105.393	0.275525
